# Supplementary material
Source: PubMed Central journal article supplement (PMC5435447)
Supplement: supp_tpc.17.00162_TPC2017-RA-00162_Supplemental_Figures_1_6_new.pdf [file supp_tpc.17.00162_TPC2017-RA-00162_Supplemental_Figures_1_6_new.pdf]

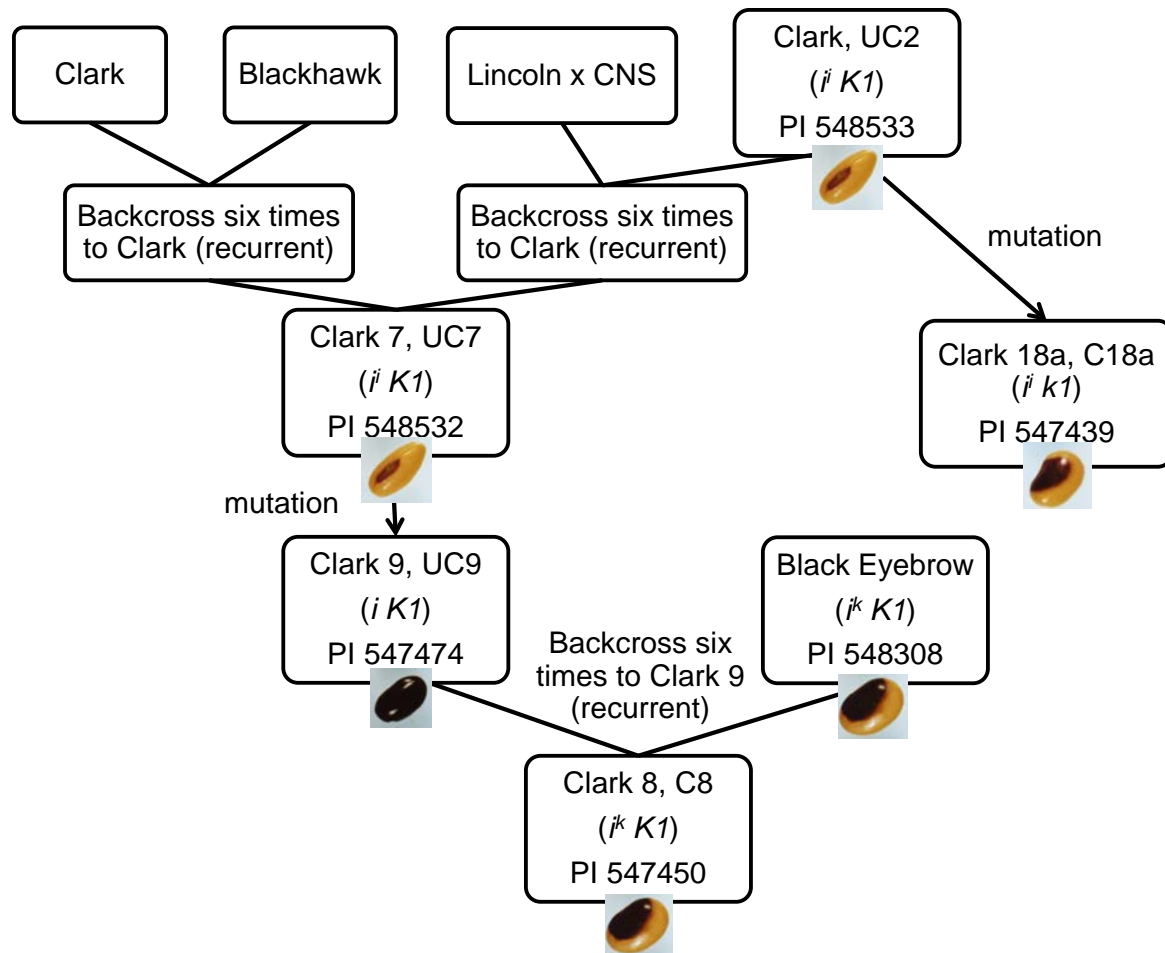

**Supplemental Figure 1.** The Pedigree of Clark Isolines that Show the Saddle Pattern Phenotype.

The saddle variety having the recessive *k1* allele, Clark 18a, is a mutant of Clark which has the dominant *K1* allele with *i*. Another variety showing the saddle pattern phenotype, Clark 8, is an isoline resulting from six generations of backcrossing the *i* allele into the pigmented Clark UC9 isoline which carries the recessive *i* allele. The seed insets represent the phenotypes. The C or UC numbers are internal lab numbers. The PI numbers are the official USDA germplasm numbers for these lines created by Richard L. Bernard, USDA, in the 1960-70's and are searchable at the national GRIN (Germplasm Resources Information Network) database. The Clark UC9 *i* mutation (PI547474) is listed as received in 1965 from Portageville, Missouri and is a deletion of *CHS* genes in the *I* locus region (Todd and Vodkin, 1996). The Clark 18a *k1* mutation (PI547439) used in this study is listed as found in Ames, Iowa in 1956.

A

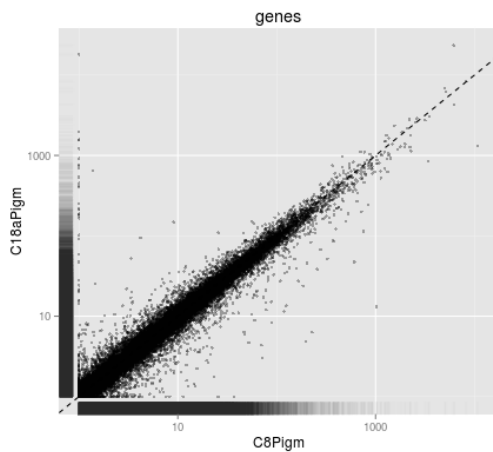

B

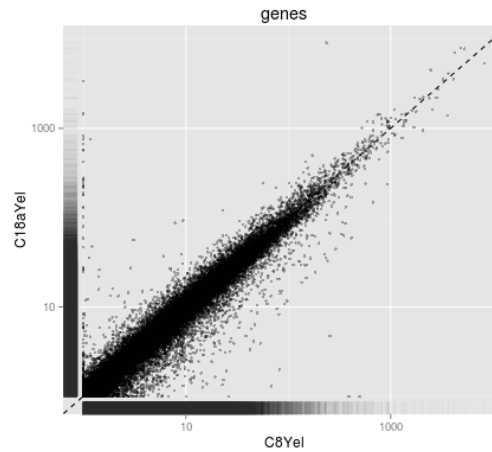

C

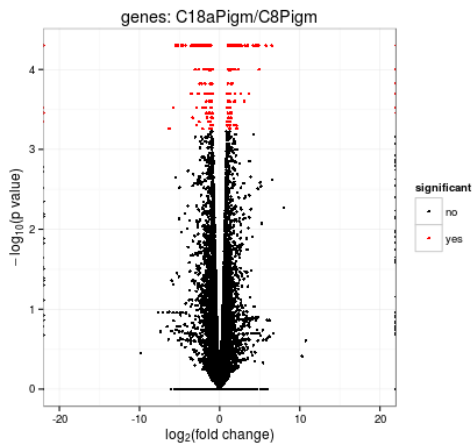

D

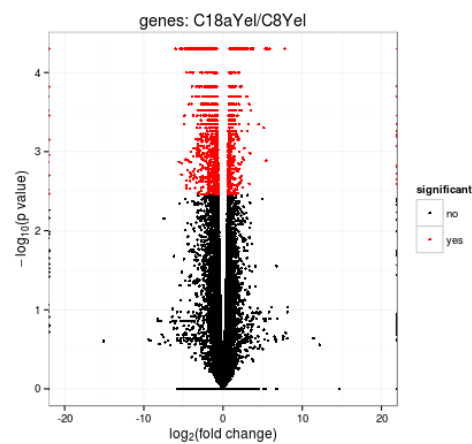

**Supplemental Figure 2.** Cufflinks Plots Comparing RNA-Seq Data From Clark (*k1*) and Clark 18a (*k1*).

These plots assess quality of RNA-Seq using the Cufflinks package (Trapnell et al., 2012).

C8: Clark 8; C18a: Clark 18a; Pigm: pigmented region; Yel: non-pigmented region

(A) and (B). Scatter plots highlight general similarities in comparison of gene expression between Clark 8 and Clark 18a (*k1*) pigmented region (A) or Clark 8 and Clark 18a non-pigmented region (B). Each dot represents an individual gene.

(C) and (D). Volcano plots show the observed differences in gene expression relating to the significance under the statistical model of the Cufflinks package. Genes with an adjusted p value  $<0.05$  are indicated by red dots. There are fewer differentially expressed genes in the comparison of the black saddle regions from Clark 8 (*K1*) to Clark 18a (*k1*) (C) than in the comparison of the yellow sectors (D).

A

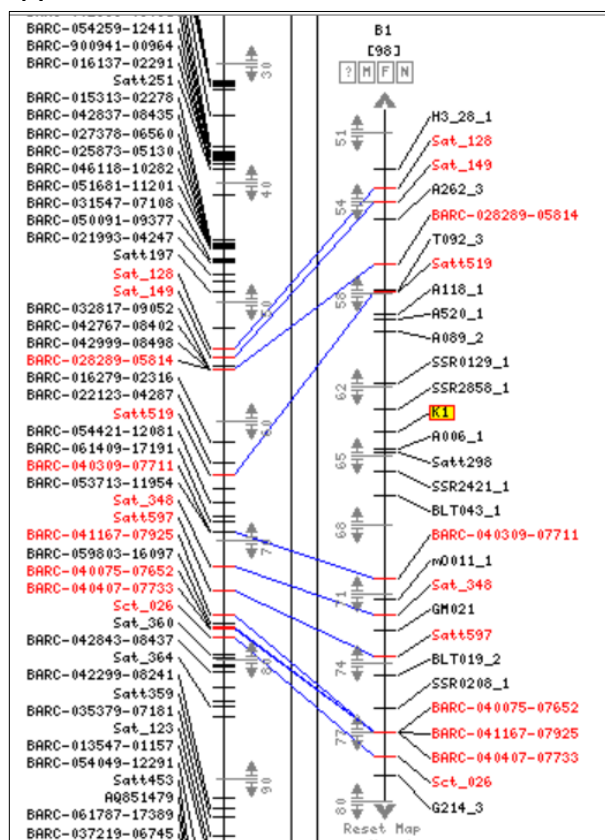

B

| Object Name       | LG        | Start cM  | Stop cM   | Object Type |
|-------------------|-----------|-----------|-----------|-------------|
| Sat_128           | B1        | 53.41     | 53.41     | SSR         |
| Sat_149           | B1        | 54        | 54        | SSR         |
| BARC-028289-05814 | B1        | 56.7      | 56.7      | SNP         |
| Satt519           | B1        | 57.91     | 57.91     | SSR         |
| SSR0129_1         | B1        | 61.9      | 61.9      | SSR         |
| SSR2858_1         | B1        | 63        | 63        | SSR         |
| <b>K1</b>         | <b>B1</b> | <b>64</b> | <b>64</b> | <b>Gene</b> |
| Satt298           | B1        | 64.91     | 64.91     | SSR         |
| SSR2421_1         | B1        | 65.7      | 65.7      | SSR         |
| BARC-040309-07711 | B1        | 70.34     | 70.34     | SNP         |
| Sat_348           | B1        | 71.97     | 71.97     | SSR         |
| Satt597           | B1        | 73.76     | 73.76     | SSR         |
| SSR0208_1         | B1        | 76        | 76        | SSR         |
| BARC-040075-07652 | B1        | 77.01     | 77.01     | SNP         |
| BARC-040407-07733 | B1        | 77.01     | 77.01     | SNP         |
| BARC-041167-07925 | B1        | 77.01     | 77.01     | SNP         |
| Sct_026           | B1        | 78.12     | 78.12     | SSR         |
| Sat_360           | B1        | 80.19     | 80.19     | SSR         |

C

```

TGACTCTAAAGCAGAACAAGCAAAC[A/T]TCTACCTTAAAT
CCCCAATCCCCAACTTTAAGCCAGCATTGCTCAATAGAGATC
TCCTTCCTTGIGAGTTTCAATTACACAGTCTGCAGTTGGATAG
GAGACACAAGTAAGCACAAAGCCTTCCTTCAGTTGGTTGTTCAT
CGAGGAATGAGCCATCAGACTGGTCCACAGAACAGCAACAAT
CTCCCAGCACAGGTAGAGCATGCTCCGGCTCGGCAAGAGTAA
    
```

**Supplemental Figure 3.** Mapping Information Resources at Soybase for the *K1* Locus.

(A) Screenshot of markers surrounding the position of the *K1* locus (yellow) on Chromosome 11 (historical linkage group B1) as shown at Soybase (Grant et al., 2010) <http://soybase.org/> for the soybean composite marker map.

(B) Download of all SSR and SNP markers surrounding the *K1* gene locus (yellow) between 50 and 80 centimorgans showing two putative flanking markers. Not all markers have available sequences.

(C) Sequence surrounding BARC-040309-07711 used to find its position in the reference genome.

(D) Our diagram of the position of the markers on the two versions of the soybean reference genome (Wm82.a1 and Wm82.a2) showing the relative position of the Glyma model representing the AGO5 gene (yellow) which we identify in this report to be the *K1* locus. In the a2 assembly of the genome, only one of the markers (BARC-040309-07711) was located on chromosome 11 while the other marker (Satt519) was found on scaffold 21, possibly due to a discrepancy in the genome assembly.

D

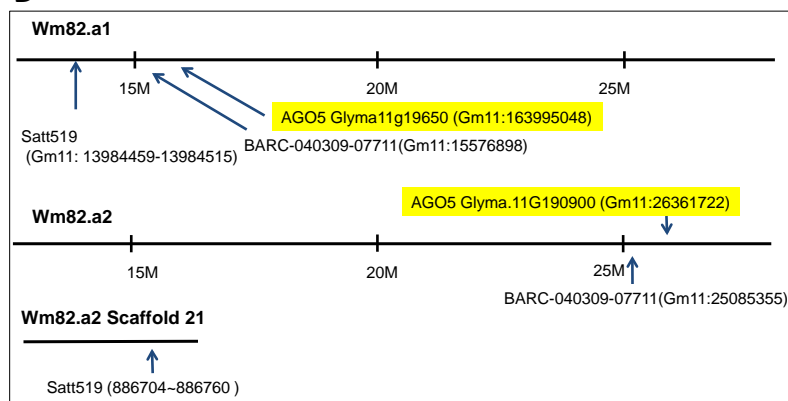

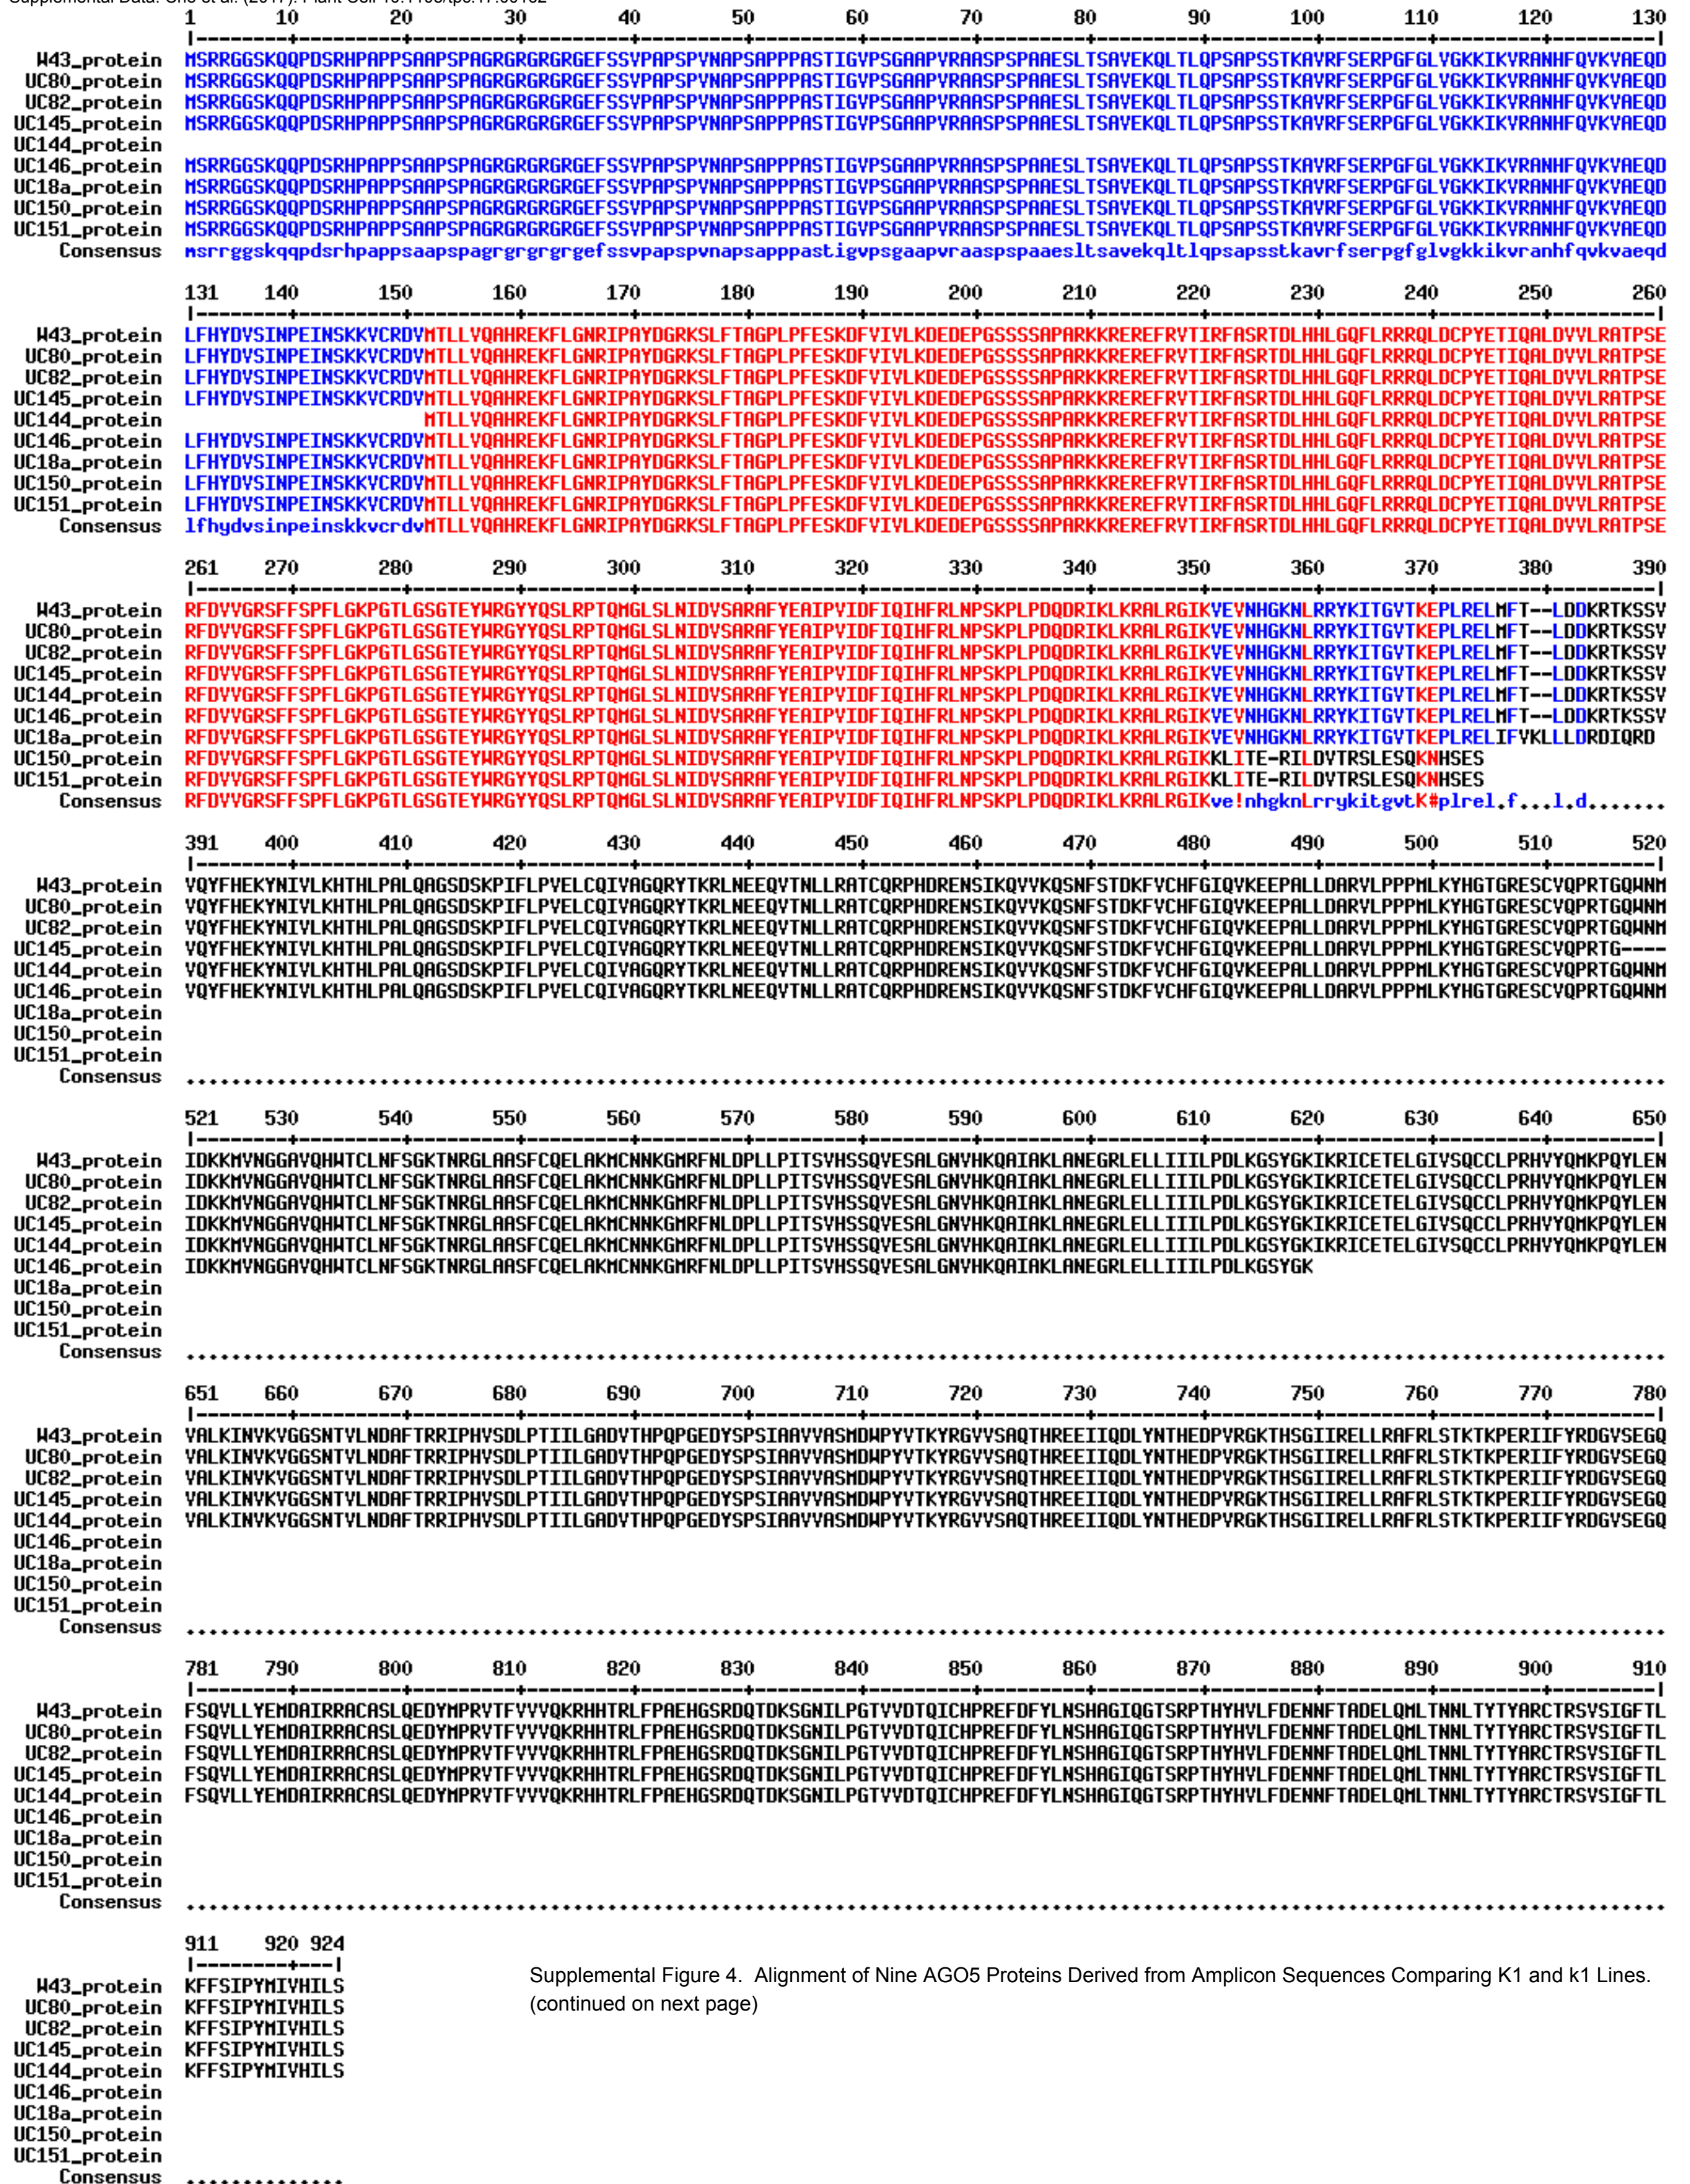

**Supplemental Figure 4.** Alignment of Nine AGO5 Proteins Derived from Amplicon Sequences Comparing *K1* and *k1* Lines. (continued from previous page)

The cultivar or mutant genotypes of the following nine predicted proteins derived from amplicon sequencing were aligned with Multalin <http://multalin.toulouse.inra.fr/multalin/>

|       |          |                |                                         |           |
|-------|----------|----------------|-----------------------------------------|-----------|
| W43   | PI548631 | Williams       | Reference                               | <i>K1</i> |
| UC80  | PI548362 | Lincoln        | Parent line                             | <i>K1</i> |
| UC82  | PI548527 | Calland        | Parent line                             | <i>K1</i> |
| UC145 | PI634895 | L88-5422       | saddle pattern mutant from Lincoln 1945 | <i>k1</i> |
| UC144 | PI634873 | L88-5344       | saddle pattern mutant from Calland 1970 | <i>k1</i> |
| UC146 | PI634896 | L88-5424       | saddle pattern mutant from Lincoln 1954 | <i>k1</i> |
| UC18a | PI547439 | L67-3479       | saddle pattern mutant from Clark 1956   | <i>k1</i> |
| UC150 | PI506948 | Kurakake       | saddle pattern variety from Japan, 1987 | <i>k1</i> |
| UC151 | PI506949 | Kurakake Daizu | saddle pattern variety from Japan, 1986 | <i>k1</i> |





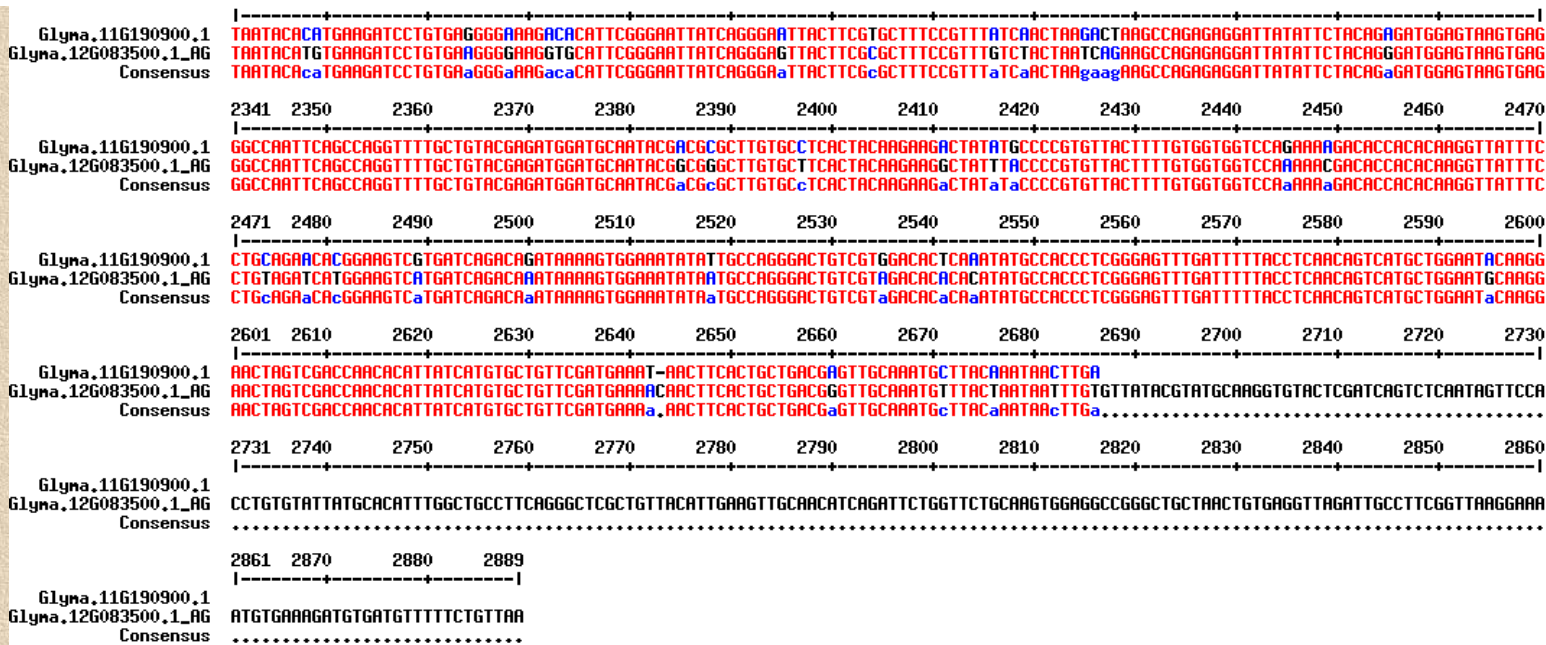

Supplemental Figure 5. Alignment of Two Closely Related Soybean AGO5 Coding Sequence Transcripts.

The coding sequences of Glyma.11G190900.1 (2673 bp) and Glyma.12G083500.1 (2886 bp) were aligned using Multalin at <http://multalin.toulouse.inra.fr/multalin/>.

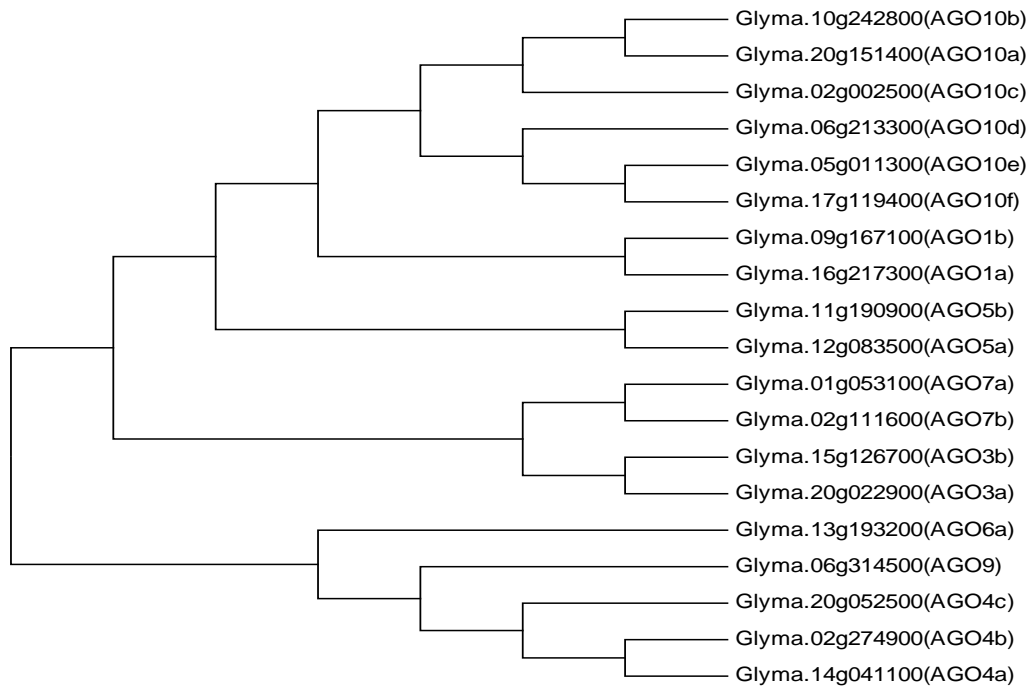

**Supplemental Figure 6.** Phylogenetic Tree for Soybean Argonaute Genes

(Top) Phylogenetic analysis for 20 soybean AGO genes was performed with MUSCLE and MEGA v6.0 programs by the maximum-likelihood method with 500 bootstrap replicates as Liu et al. (2014) described.

(Right) The gene model number of AGO genes in both soybean reference genomes. The list of Wm82.a1.v1.1 was reported in Liu et al., 2014 and the a, b, c, etc. subclassification follows that nomenclature to distinguish homologs.

| Annotation | Wm81.a1.v1.1  | Wm82.a2.v1        |
|------------|---------------|-------------------|
| AGO1a      | Glyma16g34300 | Glyma.16G217300   |
| AGO1b      | Glyma09g29720 | Glyma.09G167100   |
| AGO3a      | Glyma20g02820 | Glyma.20G022900   |
| AGO3b      | Glyma15g13260 | Glyma.15G126700   |
| AGO4a      | Glyma14g04510 | Glyma.14G041100   |
| AGO4b      | Glyma02g44260 | Glyma.02G274900   |
| AGO4c      | Glyma20g12070 | Glyma.20G052500   |
| AGO5a      | Glyma12g08860 | Glyma.12G083500   |
| AGO5b      | Glyma11g19650 | Glyma.11G190900   |
| AGO6a      | Glyma13g26240 | Glyma.13G193200   |
| AGO6b      | Glyma15g37170 | no correspondence |
| AGO7a      | Glyma01g06370 | Glyma.01G053100   |
| AGO7b      | Glyma02g12430 | Glyma.02G111600   |
| AGO9       | Glyma06g47230 | Glyma.06G314500   |
| AGO10a     | Glyma20g28970 | Glyma.20G151400   |
| AGO10b     | Glyma10g38770 | Glyma.10G242800   |
| AGO10c     | Glyma02g00510 | Glyma.02G002500   |
| AGO10d     | Glyma06g23920 | Glyma.06G213300   |
| AGO10e     | Glyma05g08170 | Glyma.05G011300   |
| AGO10f     | Glyma17g12850 | Glyma.17G119400   |
| AGO10g     | Glyma04g21450 | Glyma.04G150900   |
